## CORRECTION

# Correction: Measuring intellectual capital with financial data

Carlos M. Jardon, Xavier Martinez-Cobas

The following information is missing from the Funding statement: The authors received funding support from the National Research University Higher School of Economics (NRU HSE). This paper is an output of a research project implemented as part of the Basic Research Program at the National Research University Higher School of Economics. No additional external funding was received for this study.

## Reference

1. Jardon CM, Martinez-Cobas X (2021) Measuring intellectual capital with financial data. PLoS ONE 16(5): e0249989. <https://doi.org/10.1371/journal.pone.0249989> PMID: 33939709

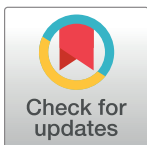

## OPEN ACCESS

**Citation:** Jardon CM, Martinez-Cobas X (2021) Correction: Measuring intellectual capital with financial data. PLoS ONE 16(10): e0259568. <https://doi.org/10.1371/journal.pone.0259568>

**Published:** October 29, 2021

**Copyright:** © 2021 Jardon, Martinez-Cobas. This is an open access article distributed under the terms of the [Creative Commons Attribution License](https://creativecommons.org/licenses/by/4.0/), which permits unrestricted use, distribution, and reproduction in any medium, provided the original author and source are credited.
